# Supplementary material for: Inducing the attachment of cable bacteria on oxidizing electrodes
Source: Copernicus journal article supplement (doi:10.5194/bg-17-597-2020), 2020-02-06
Supplement: Supplementary file [file bg-17-597-2020-supplement-title-page.pdf › bg-17-597-2020-supplement-title-page.pdf]

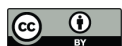

## *Supplement of*

# **Inducing the attachment of cable bacteria on oxidizing electrodes**

**Cheng Li et al.**

*Correspondence to:* Cheng Li ([cheng.li@oregonstate.edu](mailto:cheng.li@oregonstate.edu))

- [bg-17-597-2020-supplement-title-page.pdf](#)
- SI Figs
  - .DS\_Store
  - M\_1 EAGCB SI 8.22.2019.docx
  - SIFig1.pdf
  - SIFig2.pdf
  - SIFig3.pdf

The copyright of individual parts of the supplement might differ from the CC BY 4.0 License.
