# Supplementary figures and images for: Inducing the attachment of cable bacteria on oxidizing electrodes
Source: Copernicus journal article supplement (doi:10.5194/bg-17-597-2020), 2020-02-06

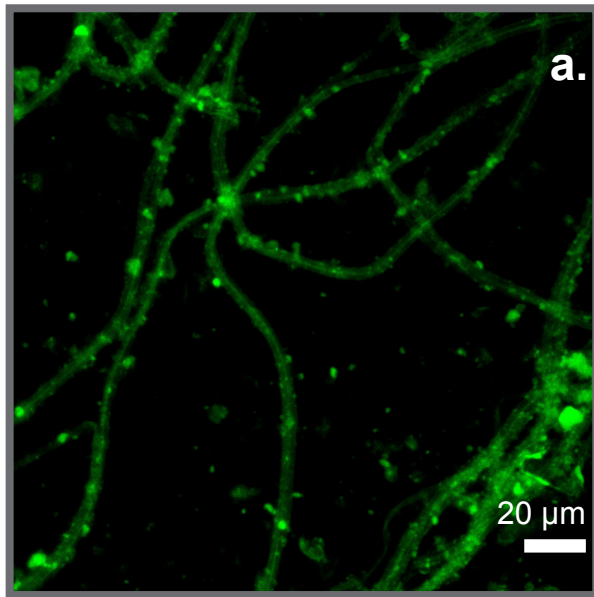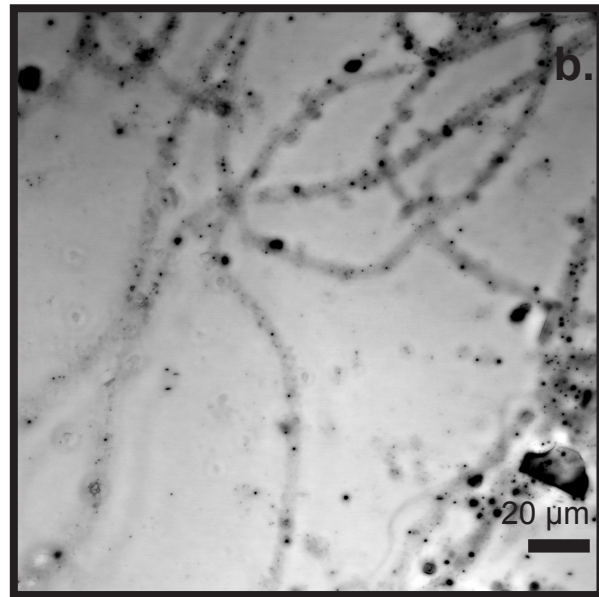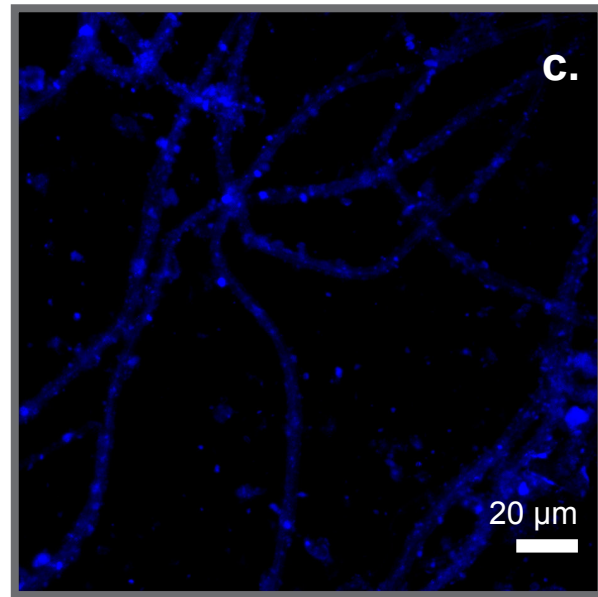

Supplement: Supplementary file 1 [file SIFig1.pdf › SI Figs/SIFig1.pdf]

a.

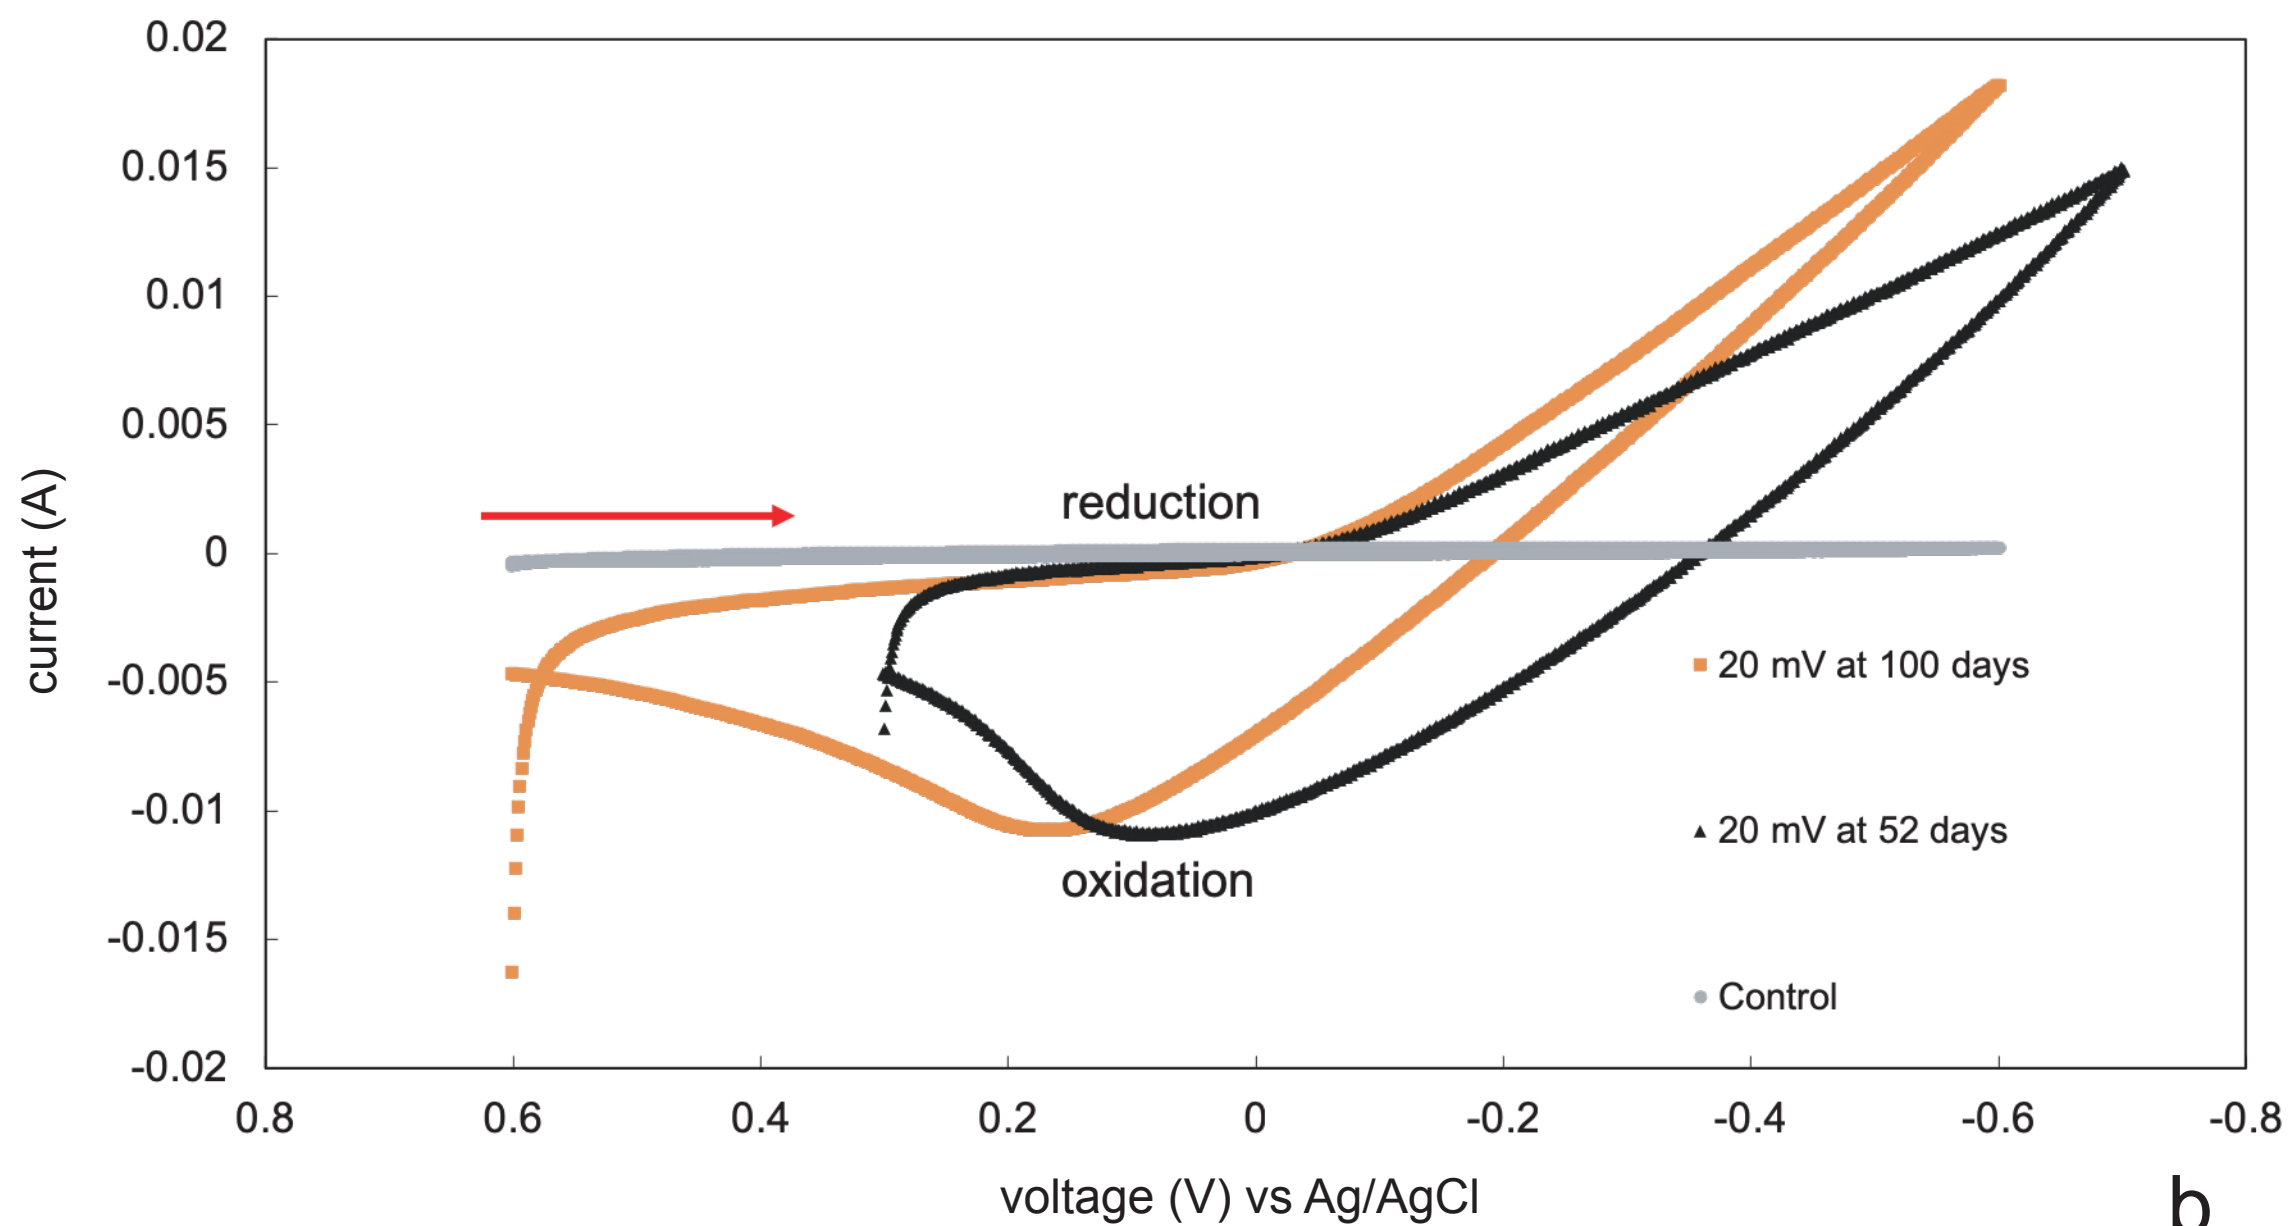

b.

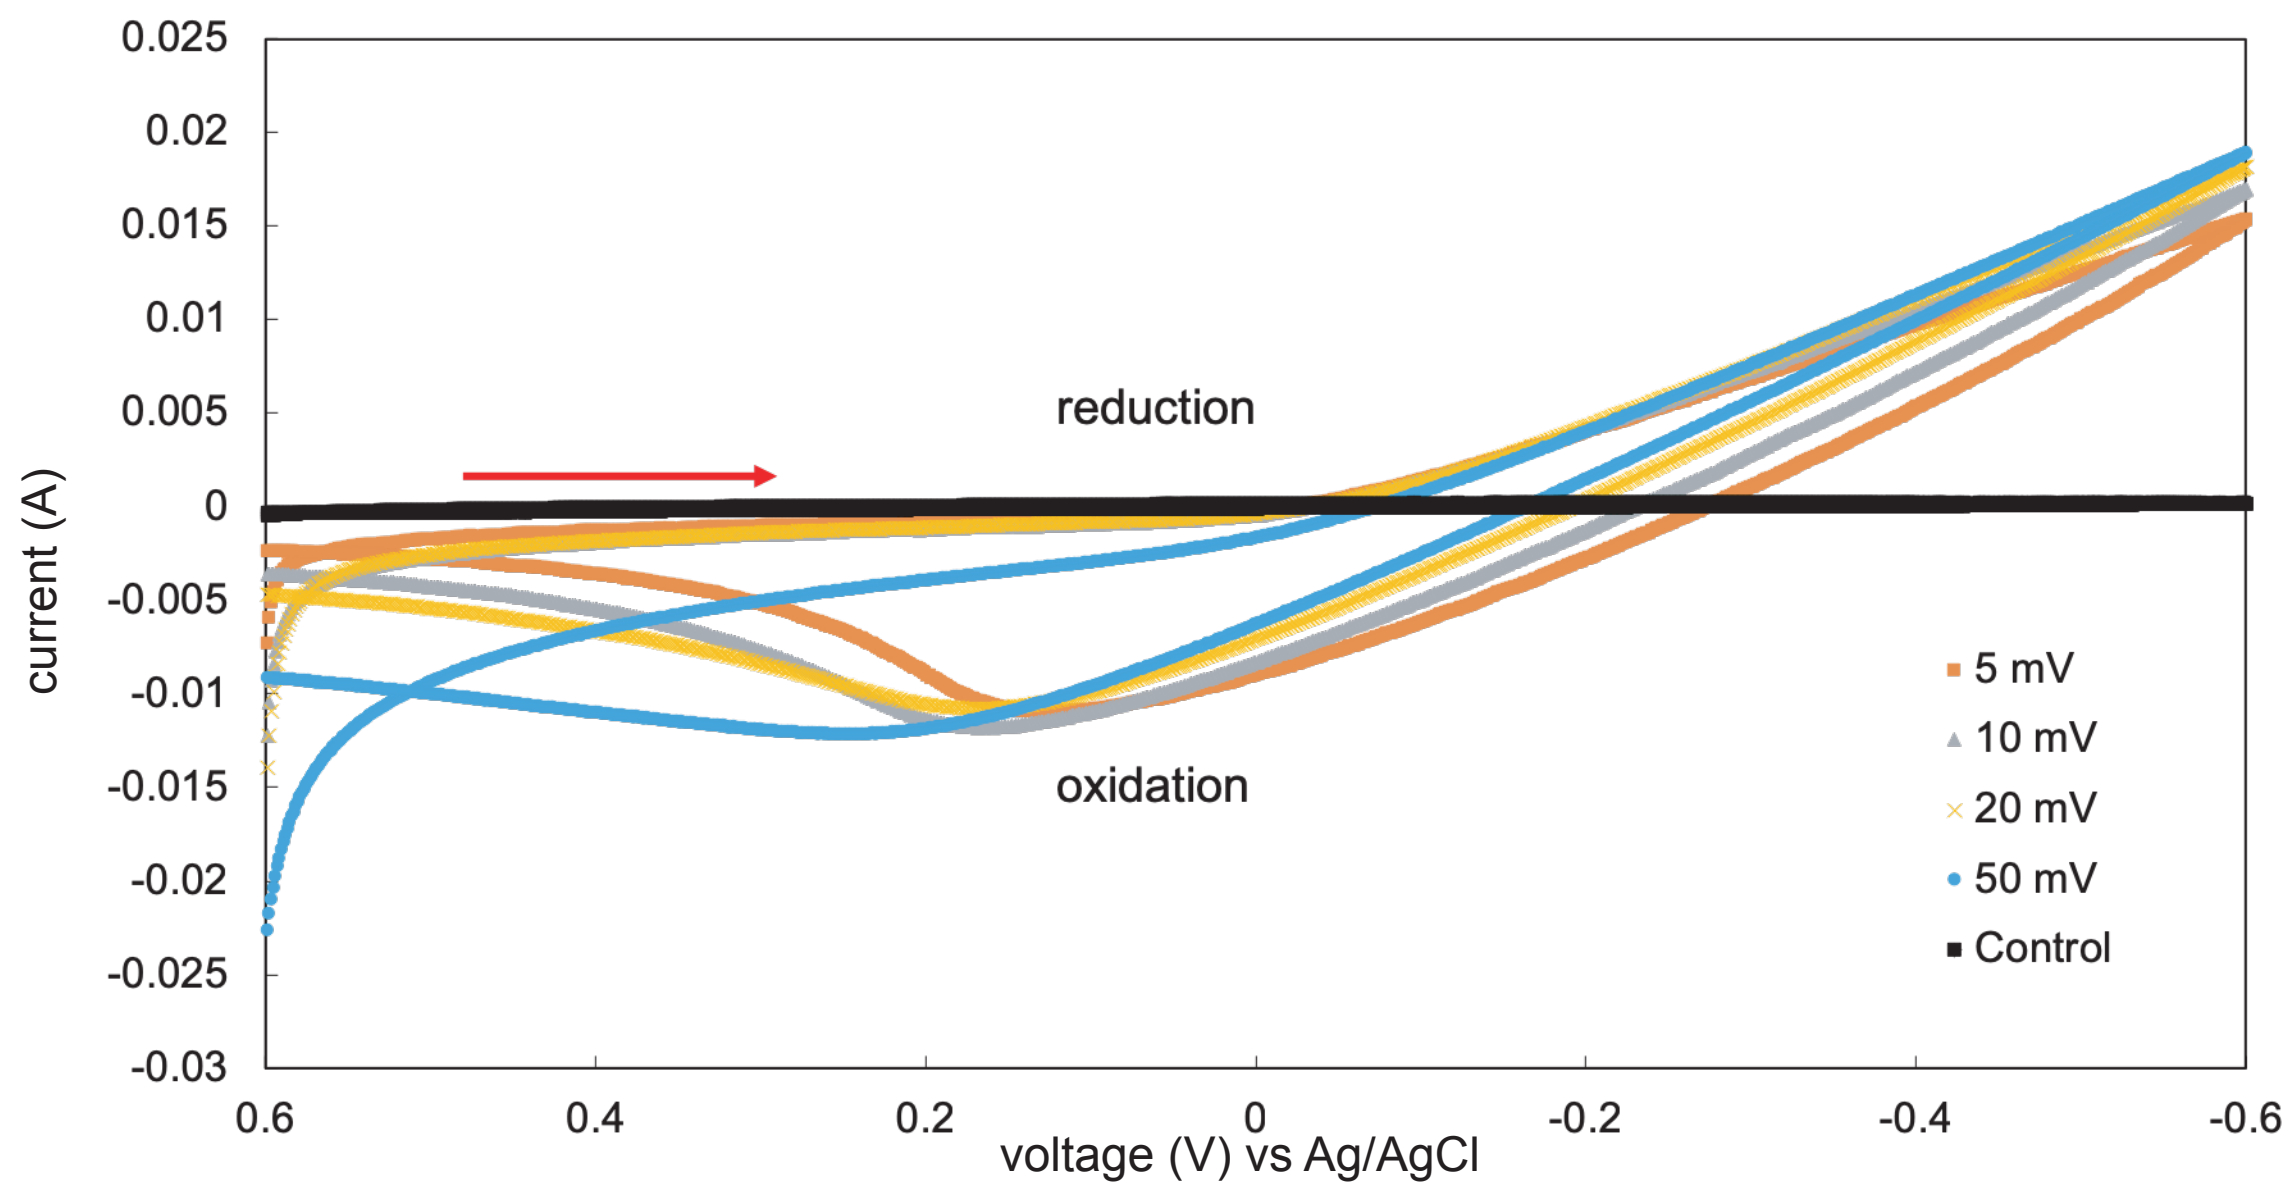

Supplement: Supplementary file 2 [file SIFig2.pdf › SI Figs/SIFig2.pdf]

a.

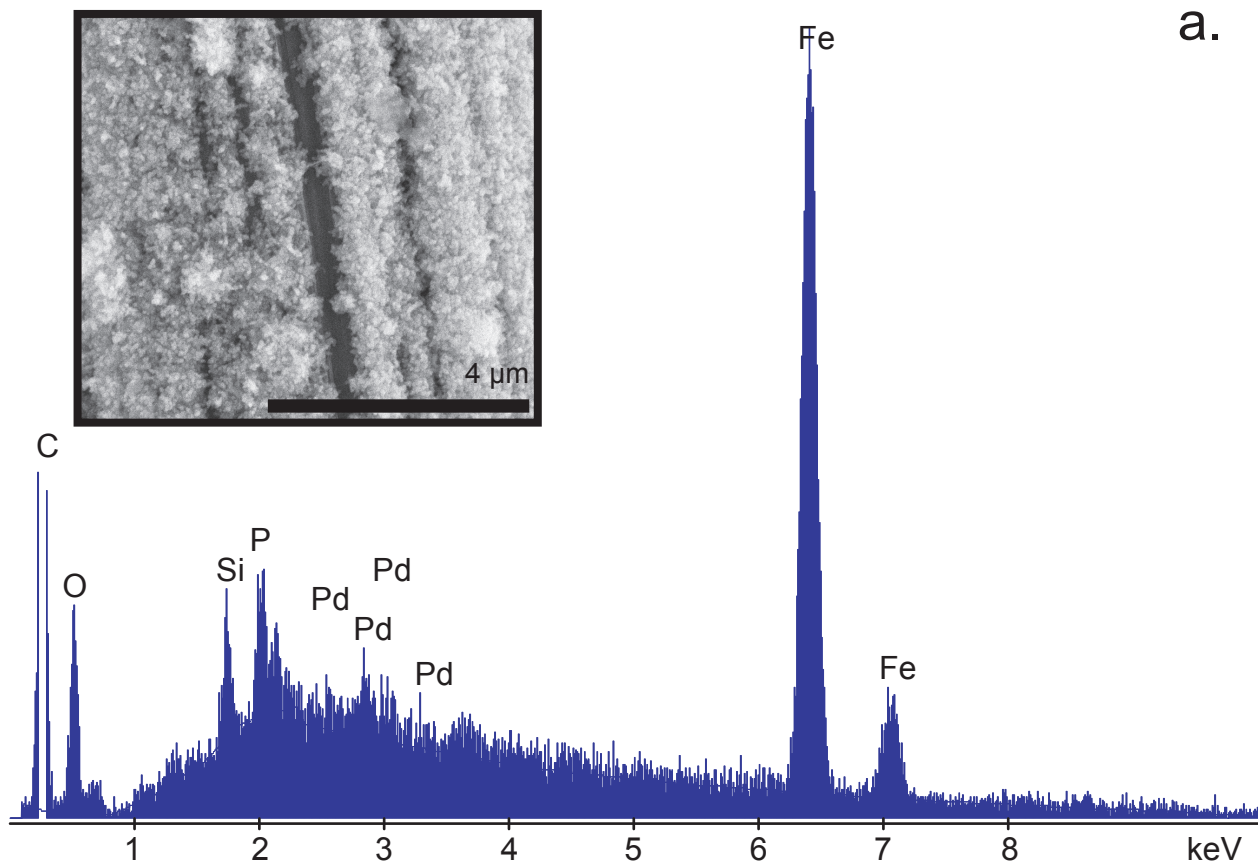

b.

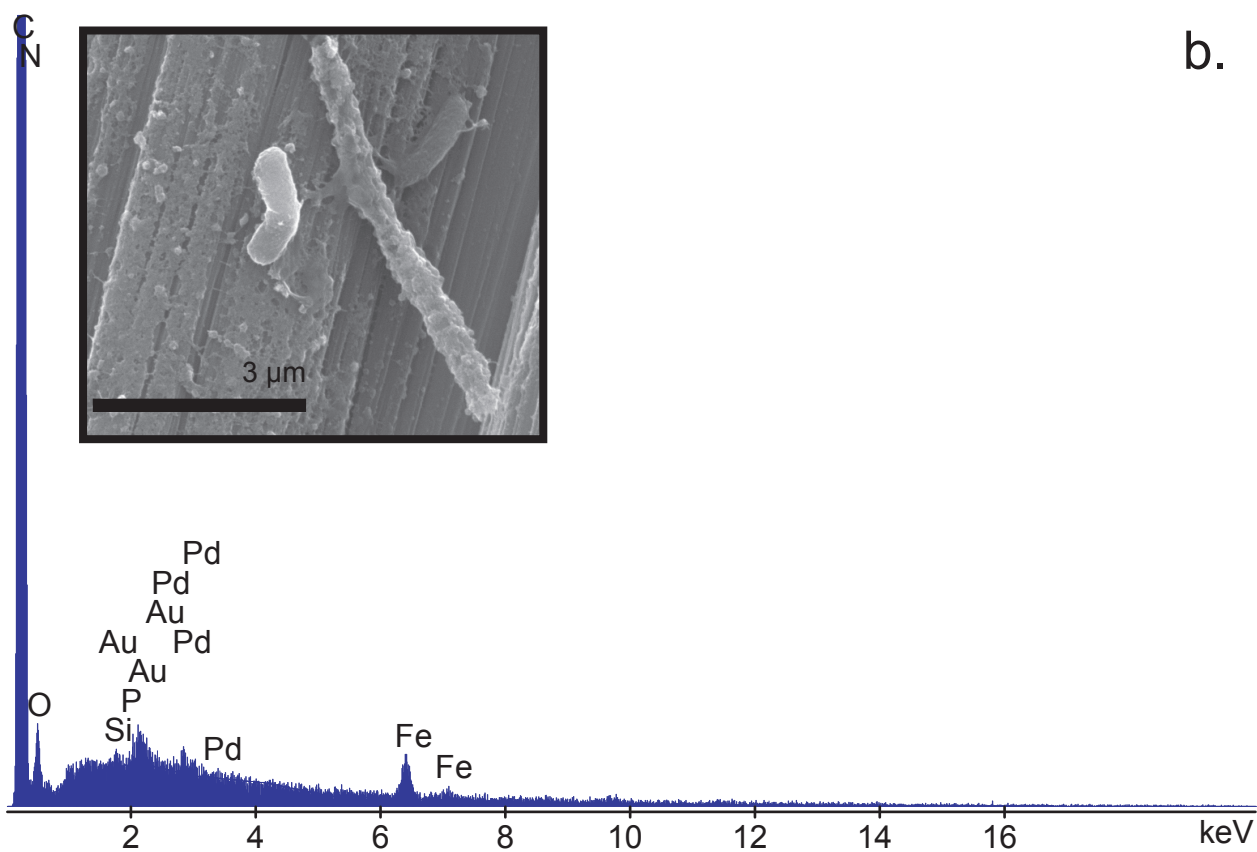

Supplement: Supplementary file 3 [file SIFig3.pdf › SI Figs/SIFig3.pdf]
